# Supplementary material for: The effect of a short oxygen exposure period on algal biomass degradation and methane release from eutrophic and oligotrophic lake sediments
Source: Copernicus journal article supplement (doi:10.5194/egusphere-2024-3979), 2025-01-16
Supplement: Supplementary file 1 [file egusphere-2024-3979-supplement.pdf]

1 The effect of a short oxygen exposure period on algal biomass degradation and  
2 methane release from eutrophic and oligotrophic lake sediments

3

4 Sigrid van Grinsven<sup>1\*</sup>, Natsumi Maeda<sup>1</sup>, Clemens Glombitza<sup>2</sup>, Mark A. Lever<sup>2</sup>,

5 Carsten J. Schubert<sup>1,2</sup>

6

7 **Supplemental information**

8

9 Table S1. Methane emission from the slurry experiments.

10

**Total methane emission**

| <b>Oligotrophic sediments</b> |                                 |                    | <b>Eutrophic sediments</b>  |                                 |                    |
|-------------------------------|---------------------------------|--------------------|-----------------------------|---------------------------------|--------------------|
|                               | [CH <sub>4</sub> ] <sup>a</sup> | Standard deviation |                             | [CH <sub>4</sub> ] <sup>b</sup> | Standard deviation |
| Permanently anoxic, algae     | 1893                            | 178                | Permanently anoxic, algae   | 4063                            | 68                 |
| 1 week oxic, algae            | 1497                            | 147                | 3 week oxic, algae          | 2576                            | 105                |
| 3 week oxic, algae            | 1186                            | 81                 |                             |                                 |                    |
| Permanently anoxic, control   | 211                             | 108                | Permanently anoxic, control | 2127                            | 293                |
| 1 week oxic, control          | 23                              | 25                 | 3 week oxic, control        | 1367                            | 162                |
| 3 week oxic, control          | 19                              | 7                  |                             |                                 |                    |

a. Concentration in headspace in  $\mu\text{M}$  after 28 weeks (constant since 14 weeks)

b. Concentration in headspace in  $\mu\text{M}$  after 24 weeks

11

12

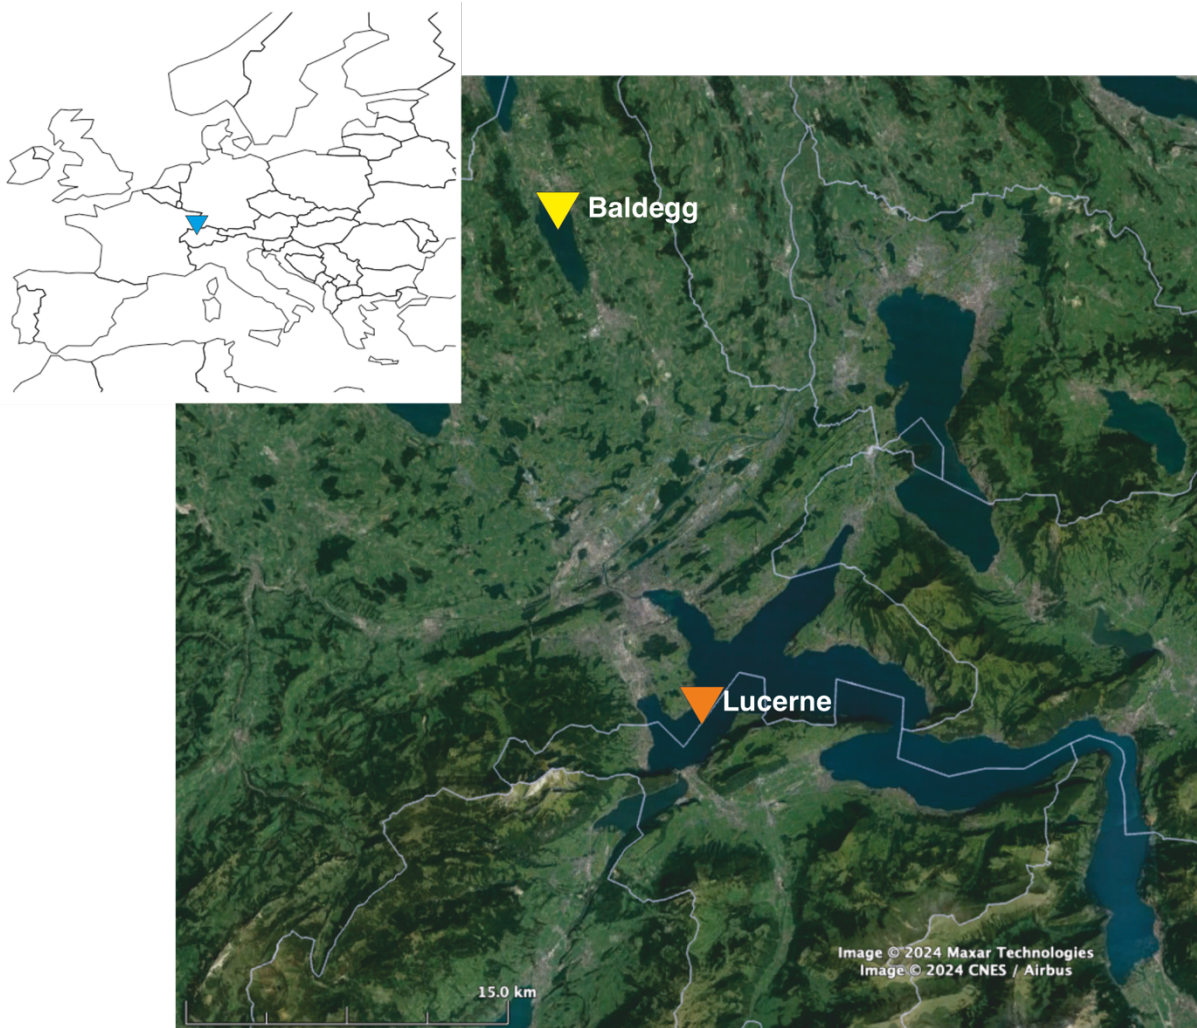

13

14 Fig. S1. Map of the surroundings and location of the study sites: Oligotrophic Lake

15 Lucerne (orange) and eutrophic Lake Baldegg (yellow) in Switzerland, central

16 Europe (blue marker on overview map).

17

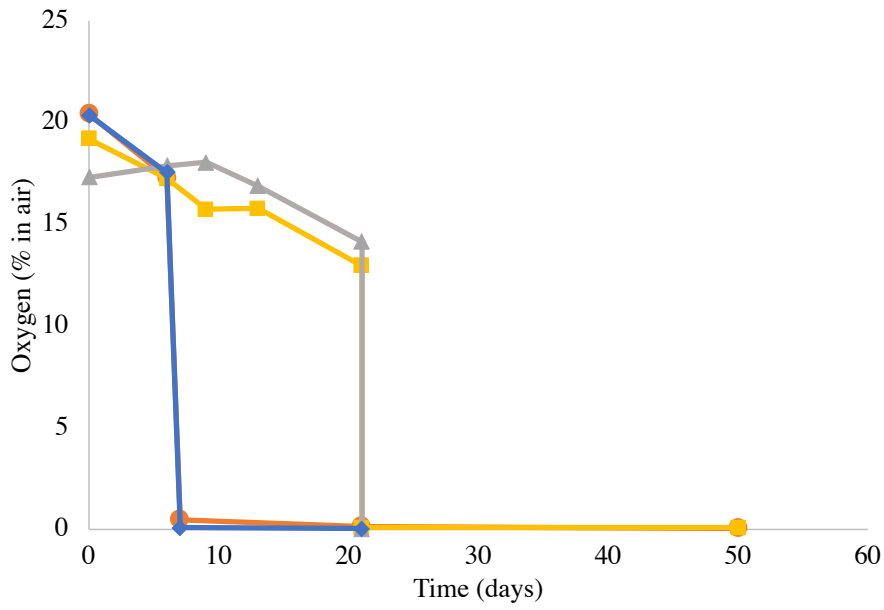

18

19

20 Fig. S2. Oxygen concentration (in % of ambient air) in the slurry experiments. Blue  
21 and orange: two replicate bottles of the 1-week oxygen exposure experiment. Yellow  
22 and grey: two replicates of the 3-week oxygen exposure experiment.

23

24

25

26

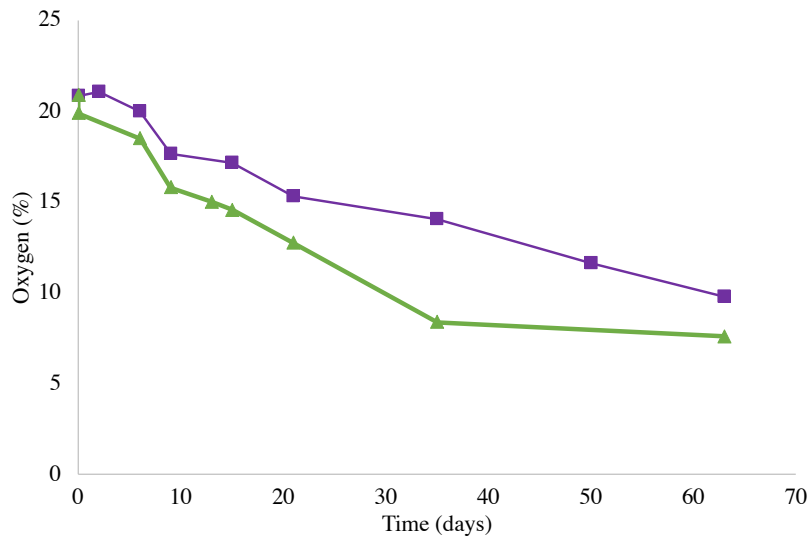

27

28

29 Fig. S3. Oxygen concentration (in % of gas headspace) in the whole core oxic  
 30 experiments. Green: oxic algal biomass addition experiment, purple: oxic control  
 31 experiment.

32

**Whole core experiment, oligotrophic**

- Oxygen exposed, algae    —●— Anoxic, algae
- Oxygen exposed, control    —●— Anoxic, control

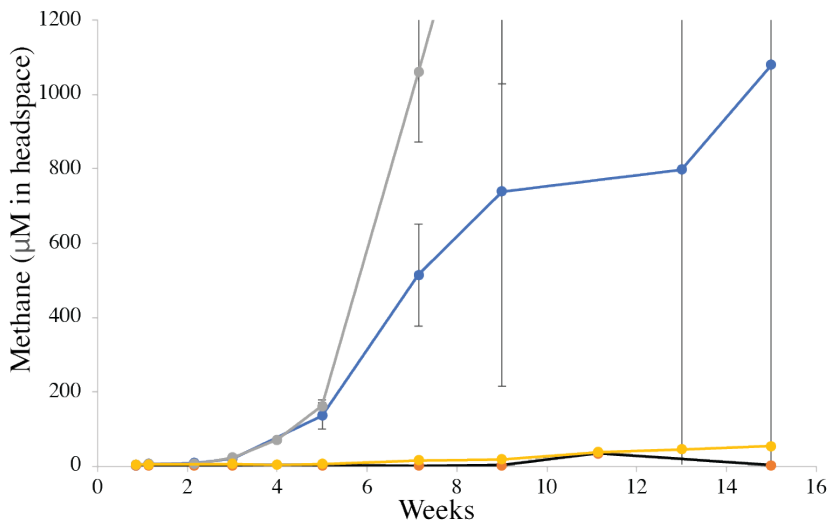

33

34 Fig. S4. Cut-out image of Fig. 3, highlighting the lower part of the y-axis.

35

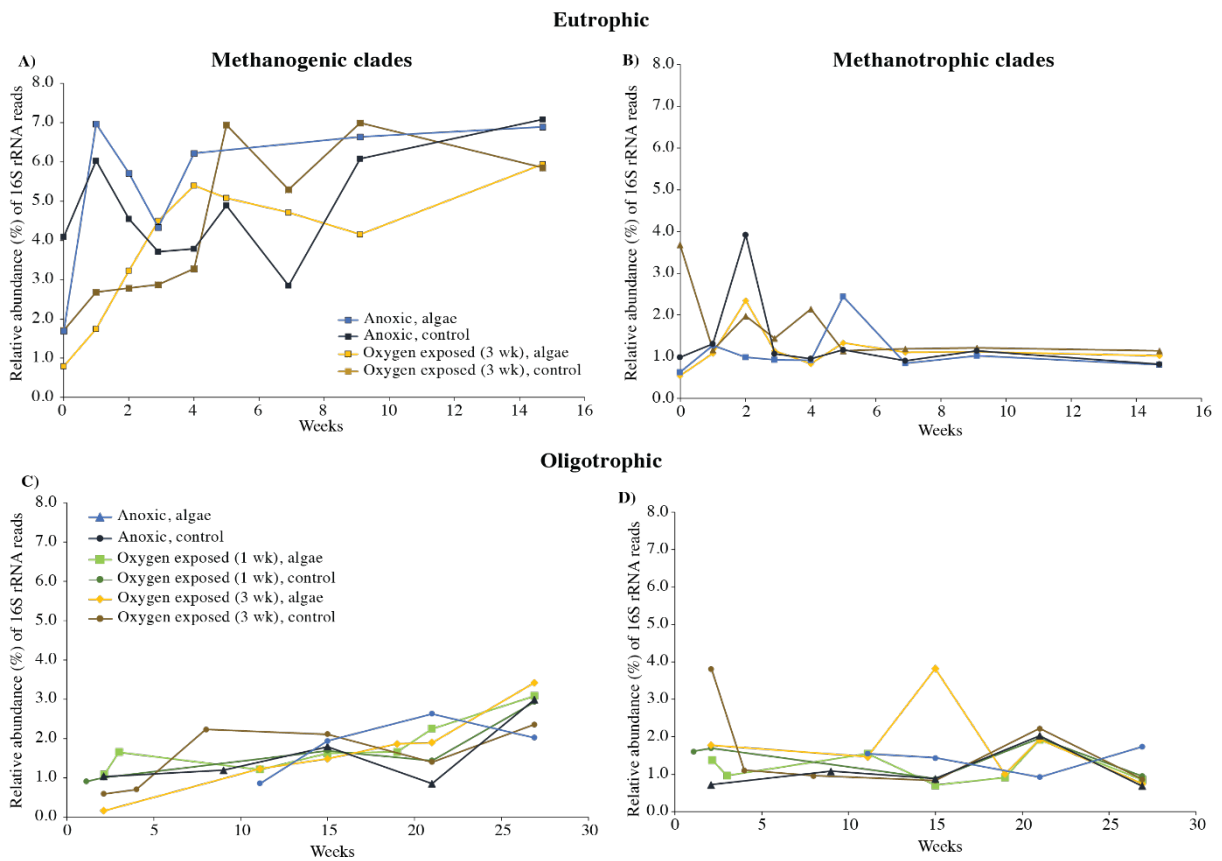

37

38 Fig. S5. Relative abundance of OTUs assigned to known methanogenic (A; eutrophic, C;  
 39 oligotrophic) and methanotrophic (B; eutrophic, D; oligotrophic) clades, in the slurry  
 40 experiments. Note that the oxic experiments received additional sediments, of the 5 – 15 cm  
 41 depth interval, after the initiation of the anoxic conditions, after 1 or 3 weeks.

42

43

### Eutrophic

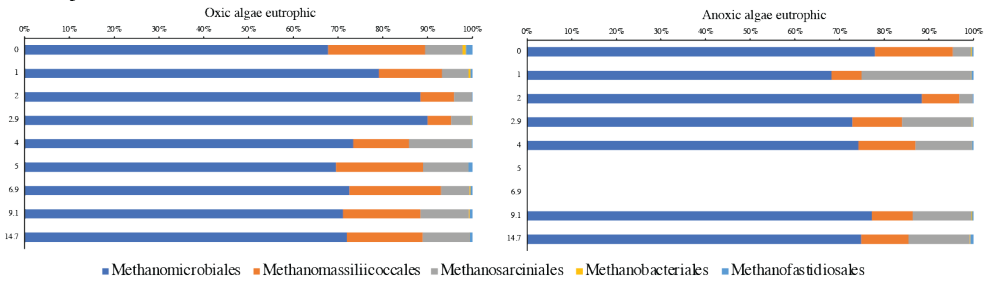

44

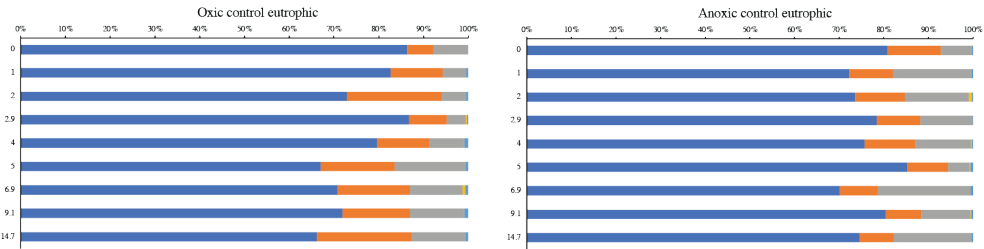

45

### Oligotrophic

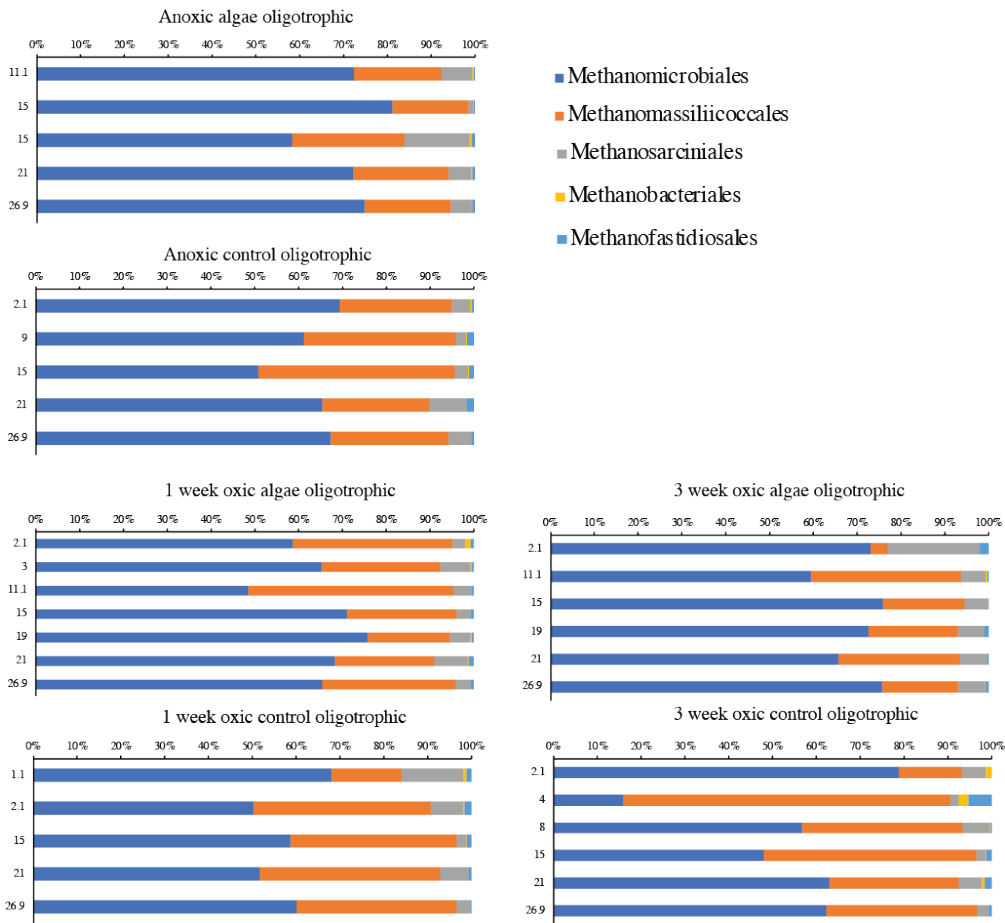

46

47

48 Fig. S6. Distribution of OTUs assigned to methanogenic orders over the five most  
49 abundant orders for both the eutrophic and oligotrophic experiments. The y-axis  
50 shows the time in weeks since the start of the experiment.

51



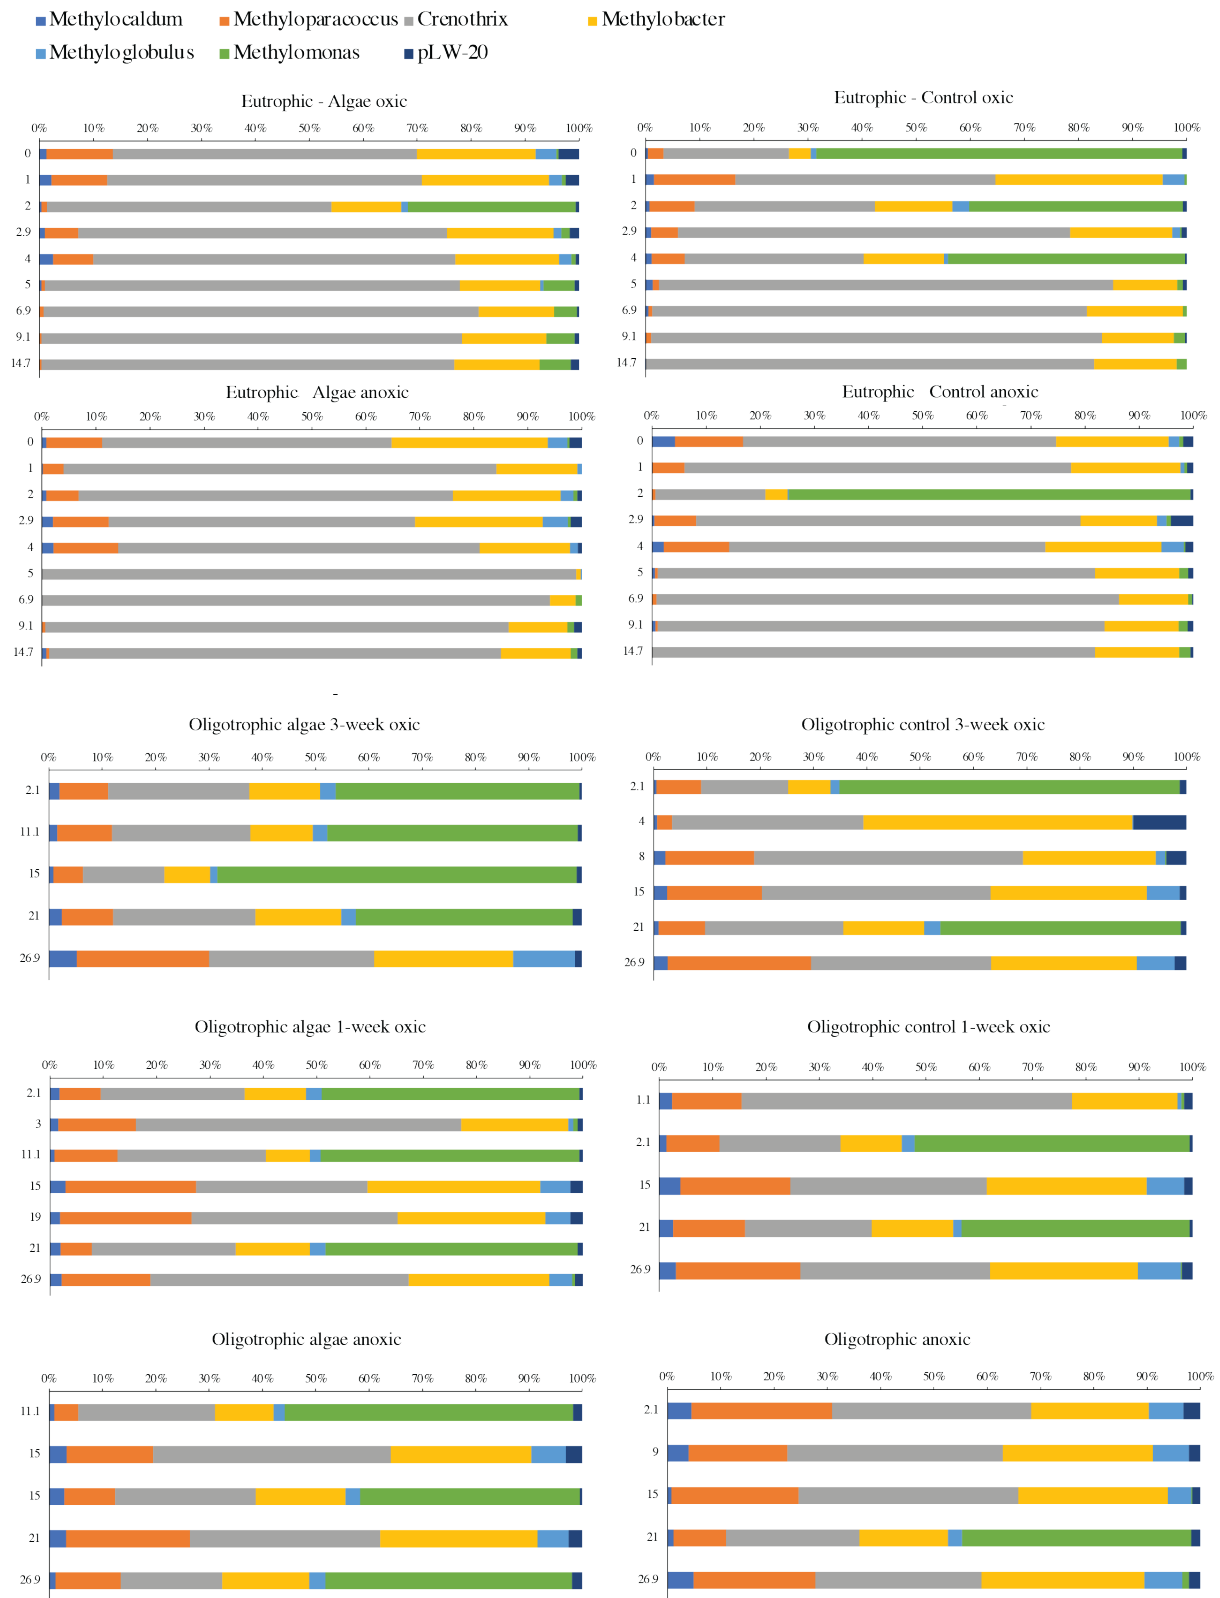

52

53 Fig. S7. Distribution of OTUs assigned to methanotrophic orders over the most  
 54 abundant orders for both the eutrophic and oligotrophic experiments. The y-axis  
 55 shows the time in weeks since the start of the experiment.

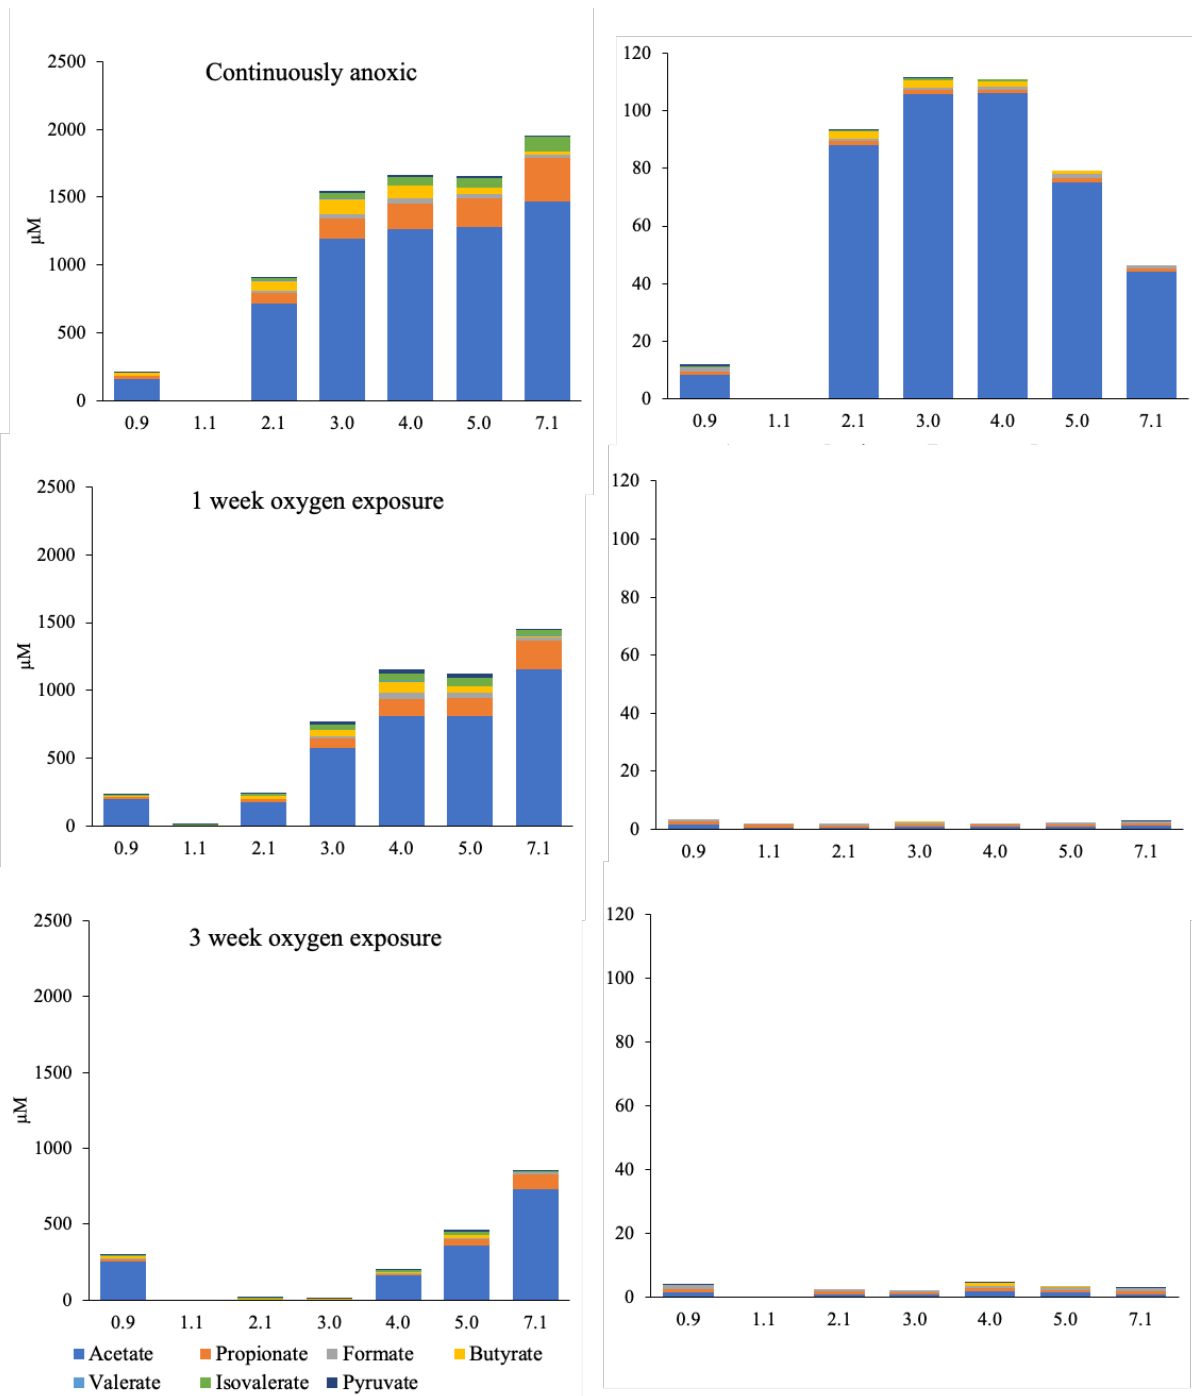

57

58 Fig. S8. Volatile fatty acid (VFA) concentrations in the oligotrophic incubations under  
 59 different oxygen regimes, with algal biomass (left) and control (right) conditions.

60

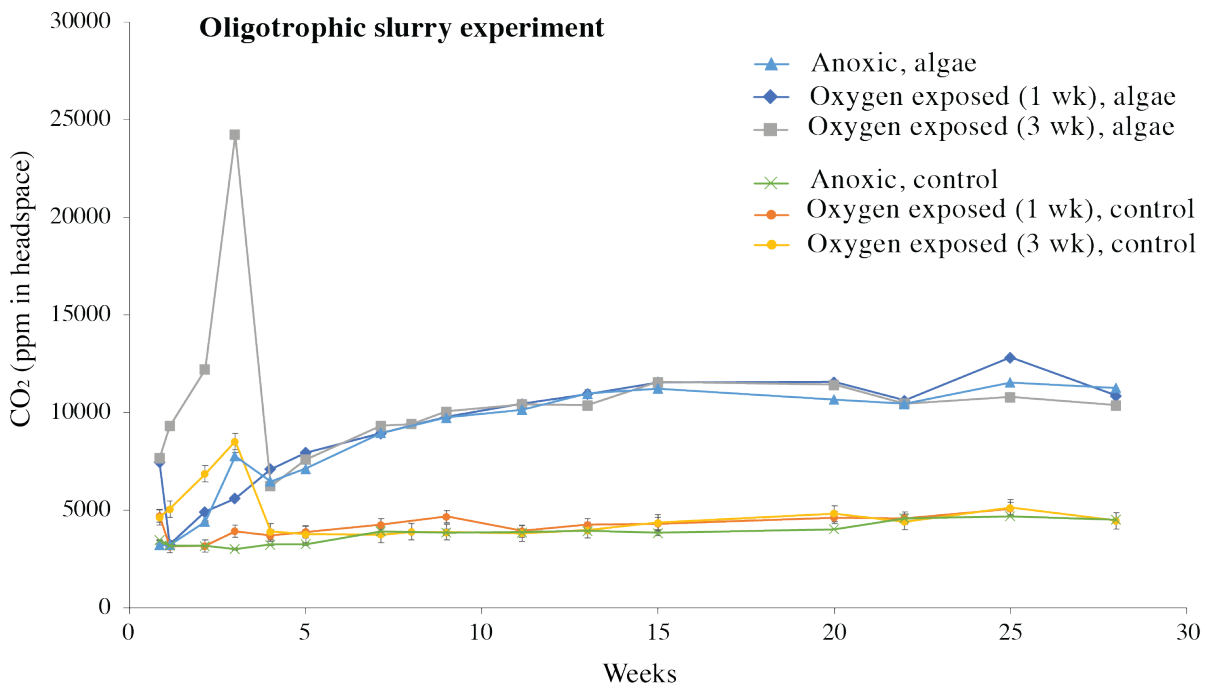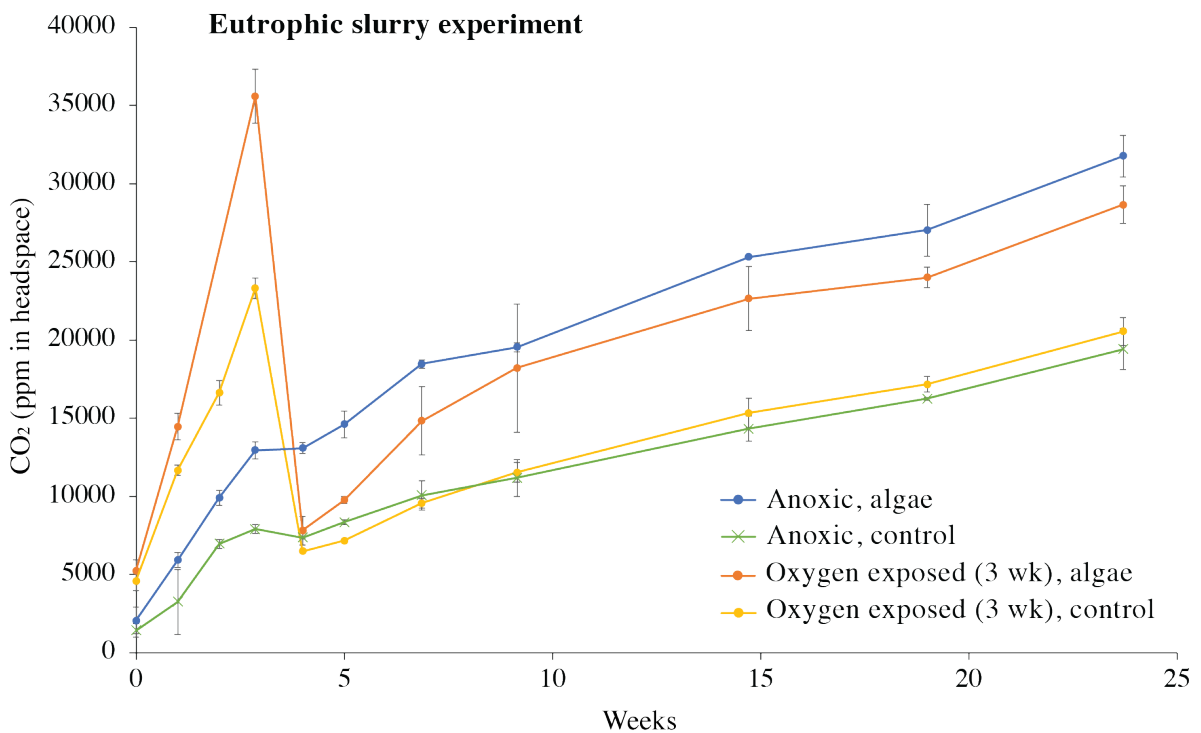

62

63 Fig. S9. CO<sub>2</sub> concentrations in the headspace of the slurry experiments. The sudden64 drop is caused by the flushing of the headspace with N<sub>2</sub> at the oxic-anoxic switch

65 after 3 weeks.

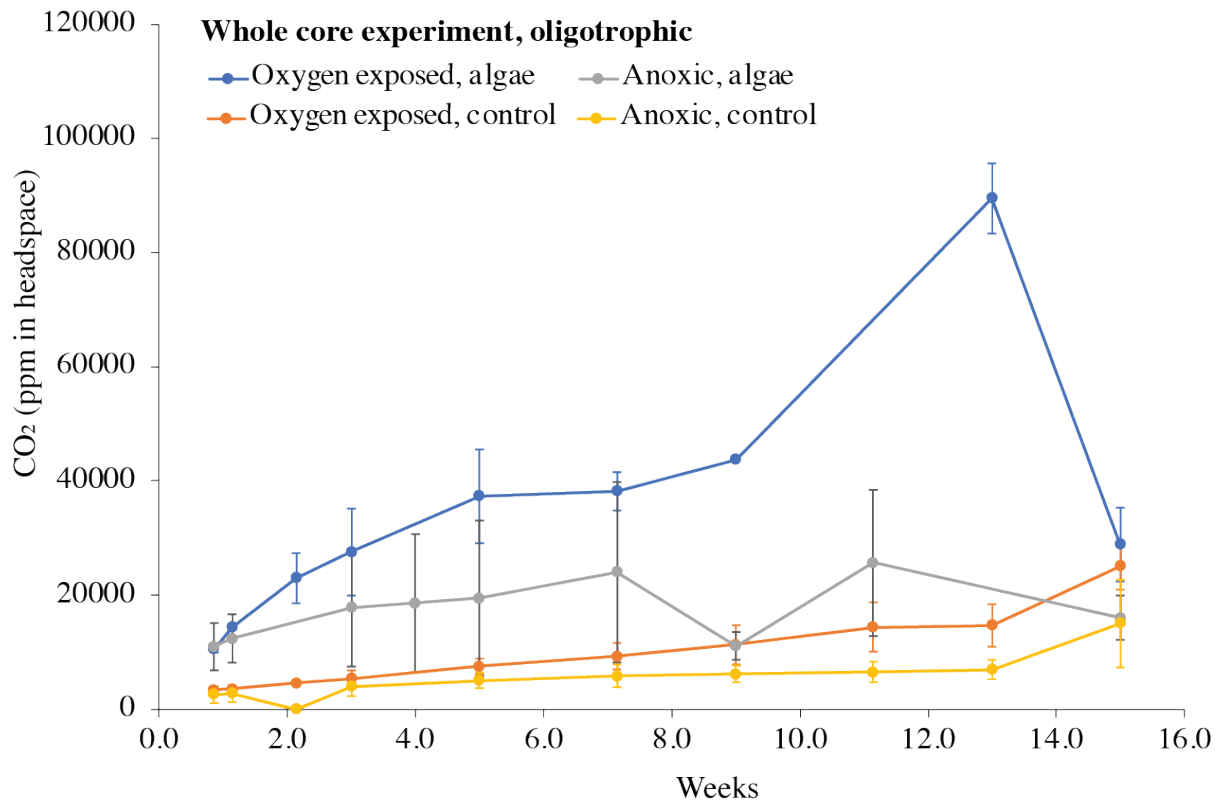

66

67

68 Fig. S10. CO<sub>2</sub> concentrations in the headspace of the whole core experiments.

69

70
