# Supplementary material for: The effect of a short oxygen exposure period on algal biomass degradation and methane release from eutrophic and oligotrophic lake sediments
Source: Copernicus journal article supplement (doi:10.5194/egusphere-2024-3979), 2025-01-16
Supplement: Supplementary file [file egusphere-2024-3979-AC1-supplement.pdf]

The effect of a short oxygen exposure period on algal biomass degradation and methane release from eutrophic and oligotrophic lake sediments

Sigrid van Grinsven<sup>1\*</sup>, Natsumi Maeda<sup>1</sup>, Clemens Glombitza<sup>2</sup>, Mark A. Lever<sup>2,4</sup>, Carsten J. Schubert<sup>1,2</sup>

We want to thank the reviewer for the throughout review of this manuscript and the many valuable suggestions, both on style and content. We have replied to the specific comments below.

We copied the reviewers comments to a word file to be able to put our replies in line, for an easier overview of comments and replies. This has however messed up the layout of the reviewer's comments, and we are sorry for any inconvenience this causes.

### General comments

Making a quick judgement, short term oxygen addition decreasing methane production from lake sediments for a longer period is an important finding. It is also self-evident, since oxygen disturbs methanogenesis and also increases methane oxidation.

A closer look makes things a bit more complicated: at shallow lakes water column has overturns and CH<sub>4</sub> may be oxidized in spring and autumn (Kankaala et al. 2007) and despite this can have large CH<sub>4</sub> emissions during open water period. Furthermore, methane oxidation in water columns may consume most of the produced methane in any case. In addition to this, aeration has other effects or not the effect wanted (Kuha et al. 2016; Niemistö et al. 2020). For a reader from northern Europe, it may be beneficial to explain how these studied lakes behave in general in order to be able to compare outcome of this study to previous ones. Now methods are lacking important things like water table depth, ice cover, possible overturns etc. On the other hand production of VFA:s don't connect to GHG balances, when no overall estimate of carbon additions and gas release is not done.

Thank you for these comments on describing the lake in more detail, which are shared by both reviewers. We will add more relevant details, and will in addition refer to data published elsewhere about these lakes. But we will also make the text on the lakes more explanatory.

We will also include additional calculations on carbon balance estimates.

It may be worth look and maybe cite studies of oxygenation (or aeration) in lake scale experiments (Pajala et al. 2023) or generally effects to overall GHG balance of lakes (Huttunen et al. 2001). Notion that decrease in CH<sub>4</sub> may not be the only change in GHG:s following oxygenation may broaden the view on this topic. Maybe sentence "Over the course of the experiment, gas samples for CH<sub>4</sub>, CO<sub>2</sub> and N<sub>2</sub>O analysis were (r.240)" hints to broader perspective on this related to GHG balance, however N<sub>2</sub>O is not mentioned later in this MS. Shall there be an other MS including N<sub>2</sub>O or can N<sub>2</sub>O be omitted here just by saying that "aeration had only minor effect to N<sub>2</sub>O production".

We will remove the part about N<sub>2</sub>O, because we focus in this manuscript on carbon dynamics and don't want to confuse the reader. Thank you for pointing this out.

Oxygen penetration to sediment in natural settings is also different when water is oxygenated compared to experiments in bottle. In this MS the problem is solved by taking upper 0 - 5 cm and 5 - 15 cm to slurry experiments, mimicking oxygen penetration depth by this way and also by doing core experiments.

Lot of work has been done (incubation VFAs, microbes), but there is lack of basic information. In the MS depth of the lakes sampled, sampling depth of sediment used in experiment is not expressed and also some other details are missing (listed below) making comparison difficult to earlier studies. So, it is also possible that these lakes are deeper, possible meromictic and having no overturns or ice cover, so results in these studies (above) may not be comparable to previously mentioned lake studies on boreal zone in more shallow lakes. Furthermore, using expression “build up to headspace in a week” makes comparisons to earlier studies even more complicated.

We will convert the results and figures to more general units, referring to methane emissions per volume of sediment, or sediment surface, to make sure that the readers can compare our results more easily to other published findings. Thank you for pointing this out.

Unfortunately I can not evaluate extensive microbial part of the MS due to my lack of knowledge. Did it bring something new to science – I can not say.

Overall, I think this is quite well written study and practically useful study about aeration in general. There is some important background information missing and also a fundamental mistake in CH<sub>4</sub> stable isotopes (is change from -70 per mill to -40 per mill depletion) and then in related discussion.

1

There is also lot of small typos. In my opinion, MS can be accepted after major revision addressing my comments and questions

Specific comments & technical corrections combined

r. 30 “in the eutrophic sediments” – is it rather “sediments from eutrophic lake”  
r. 41 and elsewhere in many places, space lacking: area(Bastviken et al. 2004); r.168 up to 6 cm(Cai

and Sayles 1996)

We are sorry that the formatting got mixes up. We will correct this in the next version of the manuscript and will in general comb through the manuscript in detail to remove any spelling and typing mistakes.

r. 144; Field sampling depth?

r: 160: The experimental setups were designed to mimic oxygen intrusion from overlying oxic water. The experimental setups were designed to mimic oxygen intrusion from overlying oxic water. Something about how oxygenation/aeration is done in general in these lakes– by surface aerobic water pumping?

We will include text in the introduction and the methods, and where useful, in the discussion, about the conditions and situation in the lakes. We recognize that this will improve the manuscript and make it more interesting and easier to interpret for the reader.

r, 168 Let there be more space!: (marine) sediments up to 6 cm(Cai and Sayles 1996)

r. 187 “Slurry experiments were performed in triplicate in 0.5L Schott bottles, filled with a final volume of 258 ml sediment slurry”. How big is the headspace then? According to our Schott “500 mL” bottles, their volume is ~607 mL, so was gas volume of headspace when sampling ~360 mL (607 mL – 258 mL + 10 mL). Is this the volume in calculation of  $\mu\text{M}$  in headspace?

We measured the volume of 5 of our Schott bottles (using water), averaged the resulting value, and used that for the headspace calculations.

r. 191 Is there any further data of added algae (C%, N%, d13C etc?) and is it possible to redo them? “0.1 g of freeze-dried Chlorella; DietFoods CH) was added to a subset of the bottles”

Yes, we have CN values of the algal biomass, and we will add these to the next version of the manuscript. These will also be used to bring a more detailed carbon balance.

r. 197 Was amount of this inoculum said somewhere. Inoculum comes a bit clearer on row. 301? ...oxygen, after which they received additional anoxic sediments, according to Table 2. “after anoxic conditions were established and the deeper anoxic sediments were added”

We tried to be concise and not repetitive, we therefore choose to refer to the table. We can think about a format that is more clear, though.

198 Maybe first the sediments in chapter... The resulting oxygen trends are shown in Fig. S2. Sediments were added via the

We don't understand this comment.

r. 203: Prior to gas extraction, 10 ml of N<sub>2</sub> or air was pushed into the bottle. Immediately after, 10 ml of headspace gas was sampled and stored in N<sub>2</sub> flushed 70 ml serum bottles.: Did you calculate how much of CH<sub>4</sub> gas was lost due to dilution and sampling 10 mL (11 -15 times) during the experiment. Is this enough to lead to lag phase, when CH<sub>4</sub> production decreases (row. 305)?

The dilution factor was the same at each sampling event. We don't understand exactly what this comment refers to, as row 305 does not mention any lag phase.

r. 191: (0.1 g of freeze-dried Chlorella; DietFoods CH); Why not to estimate amount of added carbon and d13C values of algae?

As mentioned before, we will do this in the next version of the manuscript. Thank you for the valuable suggestion!

r. 218 – 219 ... 25 cm of overlying water. To allow for headspace gas extraction over the experiment duration, 12 cm of overlying water was carefully removed without: why not to tell the headspace volume also (or only) ~942 mL? ( $\pi \cdot 5 \text{ cm}^2 \cdot 12 \text{ cm}$ )

We will add this, thank you for the suggestion.

237 A word lacking: conditions in headspace (?) were indeed retained over the full course of the oxic experiment, as was

We will adapt this, thank you for the suggestion.

**254** superscript here  $\delta^{13}\text{C}$ : ratios of methane  $^{13}\text{C}/^{12}\text{C}$  (presented in the standard  $\delta^{13}\text{C}$ -notation relative to the

We will adapt this, thank you for the suggestion.

**305** Did I calculate this right: 0.37 mg day, if diam 5 cm, then  $\sim 190 \text{ mg}/\text{CH}_4/\text{m}^2/\text{day}$ ? This is quite much and would be nice to know how much carbon was added. The methane concentration in the oligotrophic slurries plateaued (the emission almost 25-fold under permanently anoxic conditions (to  $161 \text{ } \mu\text{M}$  per week)

We will convert the values in the next version of the manuscript to more common units, to allow for easier interpretation.

**315** Does this plateau mean that easily degradable carbon ends ( $\text{CH}_4 + \text{CO}_2 + \text{WFA-C} + \text{DOC}$ ), or production is small and only compensating for  $\text{CH}_4$  lost in samplings? incubations (Fig. 2). The methane concentration in the oligotrophic slurries plateaued and remained constant

It is likely that microbial methane oxidation is occurring in the experiments as well and is decreasing the net emission. We are not able to assess the contribution of methanogenesis and methanotrophy based on our methane measurements, but we do have microbial community data that shows an abundance of methanotrophs. Therefore, we expect that the plateau occurs because methane production and consumption are balanced at the timepoint the plateau appears. If methane production would completely stop, we would see a net decrease in headspace  $\text{CH}_4$ . This is however not observed. It is possible that the production remains as high, but the consumption has increased strongly over time and therefore the net emission decreases. However, it is likely that the most labile compounds are indeed consumed at that timepoint, and that also contributes to the plateau.

**317 and 326:** Clever way to express this but for data after use and comparisons it may be advisable to express these as  $\mu\text{mol}/\text{g}$ ,  $\mu\text{mol}/\text{cm}^2$  or even  $\mu\text{mol}/\text{cm}^3$ . And is emission a right word when it is build up to headspace and no area or time included? 1900 (anoxic), 1500 (1-week oxic start) or 1200 (3- weeks oxic start)  $\mu\text{mol}$  per L headspace" Also in Sup. Tab 1: a. Concentration in headspace in  $\mu\text{M}$  after 28 weeks (constant since 14 weeks)

We will indeed change the units to more common units, to make it more comparable to literature.

**r 302:** All given concentrations and concentration increases are given in  $\mu\text{M}$  per liter headspace volume, not total amounts?

We do not understand what the reviewer refers to as total amounts, but we will convert the units to more common units to prevent this confusion.

**497** Superscript 13 and VPDB was already in methods: given in the standard  $\delta^{13}\text{C}$ -notation, relative to the Vienna Pee Dee Belemnite (VPDB) reference.

We will adapt this, thank you for the suggestion.

**r. 498 - 499** unnecessary space between rows:  $^{13}\text{CH}_4$  values in the algal biomass experiments in both the eutrophic and oligotrophic slurry

We will adapt this, thank you for the suggestion.

r. 505 Does this  $\delta^{13}\text{C}$  scale need to begin from zero? Fig. 7.  $\text{CH}_4$  values of headspace m

We will adapt this, thank you for the suggestion.

r. 525 Can there be a table of site characters already in methods, including this kind of data? Also C and N, BD etc. of sediment. Even average annual temperature and precipitations helps to get data on global scale. Now reader have no idea of lakes differences except for size and phosphorus: historic and current carbon inputs, the TOC concentrations in sediments of both lakes

Yes, as mentioned above, we will add this. Thank you for the suggestion.

r. 545 Sampling depth on lake, sediment layer depth or sample depth in sediment profile? other studies indicate that the effect of sediment depth is of stronger effect (Yang et al.

We will adapt this to bring more clarity in the next version, thank you for the suggestion.

r. 541& r. 602 space!: after which methane production rates stabilized (T. Wang et al. 2023). r.

588 Is it still “recent” in January 2025? A recent study by (Yang et al. 2021)

r. 612 added after oxygen removal. algae?

r. 625 conditions ((Sobek et al. 2009; Huttunen et al. 2006).

We will adapt this to bring more clarity in the next version, thank you for the suggestions.

r. 634 If you know pH, temperature, pressure and water amount and headspace volume this is possible with Henry's law – at least rough estimate in discussion.

However, due to difficulties in translating headspace  $\text{CO}_2$  concentrations to dissolved  $\text{CO}_2$ ,

We unfortunately do not have pH values in high enough resolution to make a confident estimate, and we therefore choose to not include such calculations.

r. 636 released as  $\text{CO}_2$ . Part of the produced  $\text{CO}_2$  will again be converted prior to release to (to  $\text{CH}_4$ , acetate?)

r. 643 As  $\text{CO}_2$  has a much lower global warming potential per mole than methane (a

r. 644 28 times lower on a hundred year basis, (Forster et al. 2021) ) the release of  $\text{CO}_2$  is converting

$\text{CH}_4$  to  $\text{CO}_2$ ...

r. 647 Can you begin a sentence with parentheses? and is stored as such in the sediments.

(Sobek et

al. 2009) published a weak linear 3

Thank you for pointing out these textual unclaritys, we will correct them according to the suggestions made.

r. 670 For me it looks that algal additions increased d13C values (not decreased as written in MS) substantially (from ~-70 per mill even to -35 per mill). This changes also discussion that follows: Since O<sub>2</sub> amendment had only slight effect towards more positive values, this show that CH<sub>4</sub> was not oxidized heavily. Is then only possible explanation then that effect was due to Spirulina biomass having high d13C values. Can you still check d13C values for algae you used? If company made algae using carbonates (not air ebullition solely), also values towards quite positive d13C values for C are possible. Also sediment bulk d13C (C % + N%) as an background information would help in this? showed more negative <sup>13</sup>CH<sub>4</sub> values in the algal biomass experiments.

We indeed have d13C values of both algae types, we will include these in the next version of the manuscript and also spend more space in the discussion on the issue brought up here. We thank the reviewer for the information!

r. 675 Sentence begins with (). pathway due to the algal biomass availability. (Zhou et al. 2022) showed r. 696 Space! variation in lake methane emission rates (Gruca-Rokosz and Cieřla 2021).  
O

r. 705 Algae addition increases also oxygen consumption aerobically, which favors methanogenesis: experiments, methane emission started almost immediately after algal biomass

We will add this to the discussion.

r. 711 Generally, only the sediment surface is affected by the oxygen conditions in

r, 728 Is this a beneficial result, if we think only CH<sub>4</sub> and other GHG:s? Can it be that if oxygenation is done in right time of year so that settled algae is used already in aerobic processes before converting to CH<sub>4</sub> in anaerobic bottom, that this kind of method will be effective in reducing CH<sub>4</sub> emissions without year round oxygenation? Our experiments show that the effect of a short (1-3 week) oxygen exposure can...

Yes, we think this could be an effective method, especially in lakes that have a relatively well defined algal bloom season/period, so it would be possible to pinpoint the right timing. Or after defining the need for temporary aeration based on (automated) Chlorophyll measurements. We however did not want to over-interpret our results, and therefore did not include such an outlook to the manuscript. We could, however, add such a paragraph to the manuscript if the reviewer considers this beneficial.

About figures: why not to put in same figure also CO<sub>2</sub> (now in SUP). There reader sees immediately that anaerobic degradation is not producing equal amounts of CH<sub>4</sub> and CO<sub>2</sub> as methanogenesis theory suggests.

We choose to present the figures like this to not overload the reader with data, and rather focus on methane throughout the manuscript. We will again try out and see whether we can create attractive figures combining CH<sub>4</sub> and CO<sub>2</sub>.

Worth reading and maybe citing:

Negligible effect of hypolimnetic oxygenation on the trophic state of Lake Jyväsjärvi, Finland, Jonna K.

Kuhaa\*, Arja H. Palomäki b, J. Tapio Keskinen a, c, Juha S. Karjalainen a Limnologica 58, 2016.

Huttunen JT, Hammar T, Alm J, et al (2001) Greenhouse Gases in Non-Oxygenated and Artificially Oxygenated Eutrophied Lakes during Winter Stratification. *J Environ Qual* 30:387–394. <https://doi.org/10.2134/jeq2001.302387x>

Kankaala P, Taipale S, Nykänen H, Jones RI (2007) Oxidation, e<sub>2</sub>lux, and isotopic fractionation of methane during autumnal turnover in a polyhumic, boreal lake. *J Geophys Res Biogeosciences* 112:1–7. <https://doi.org/10.1029/2006JG000336>

Kuha JK, Palomäki AH, Keskinen JT, Karjalainen JS (2016) Negligible effect of hypolimnetic oxygenation on the trophic state of Lake Jyväsjärvi, Finland. *Limnologica* 58:1–6. <https://doi.org/10.1016/j.limno.2016.02.001>

Niemistö J, Silvonen S, Horppila J (2020) Effects of hypolimnetic aeration on the quantity and quality of settling material in a eutrophied dimictic lake. *Hydrobiologia* 847:4525–4537. <https://doi.org/10.1007/s10750-019-04160-6>

Pajala G, Sawakuchi HO, Rudberg D, et al (2023) The Effects of Water Column Dissolved Oxygen Concentrations on Lake Methane Emissions—Results From a Whole-Lake Oxygenation Experiment. *J Geophys Res Biogeosciences* 128:1–16. <https://doi.org/10.1029/2022JG007185>

[Thank you, we will look into these!](#)
